# Supplementary material
Source: PubMed Central journal article supplement (PMC3123454)

**Figure S1**

**Epi-  
Fluorescence  
(Glu-tubulin)**

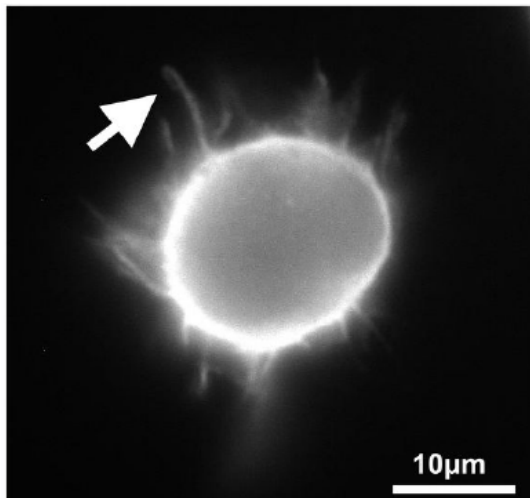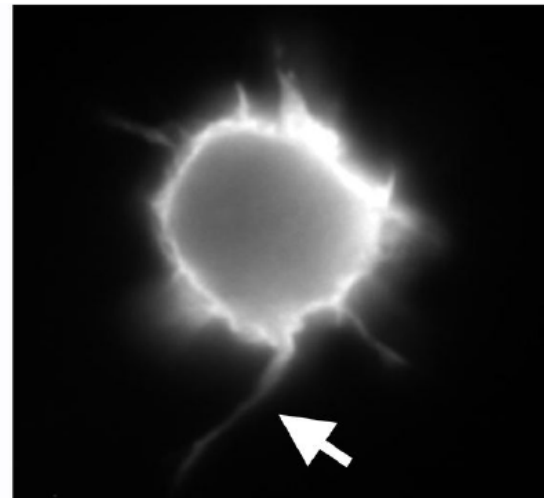

**Confocal  
(Max Intensity)**

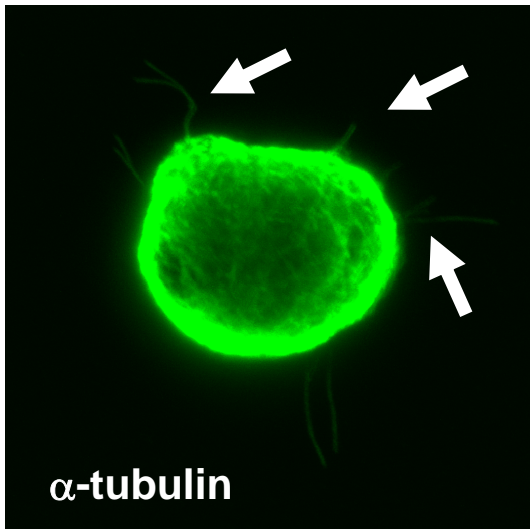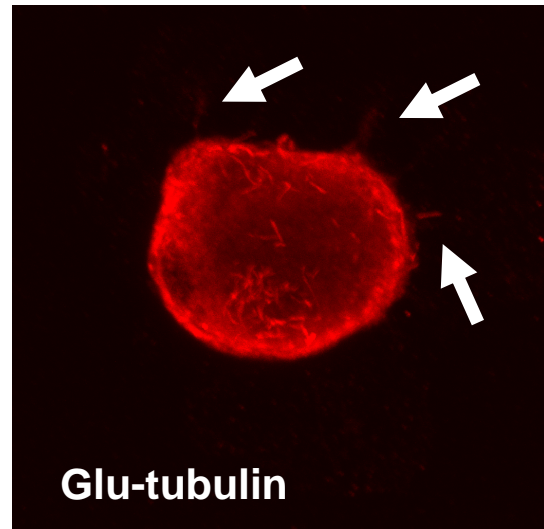

**MOVIES  
(z-series)**

**Click to play**

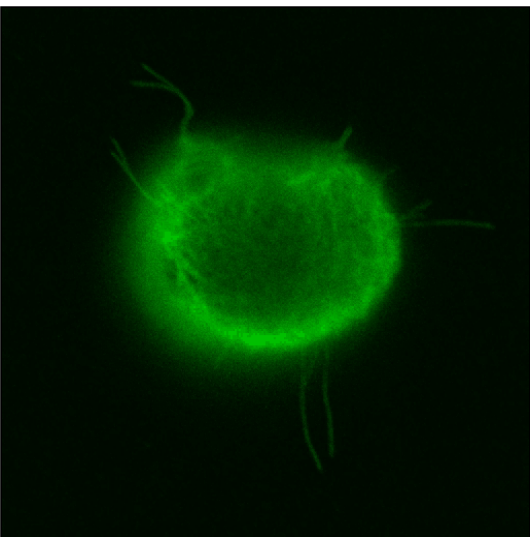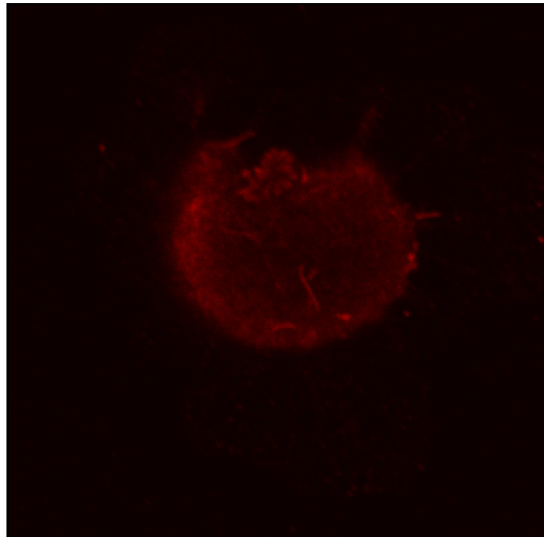

Supplement: NIHMS233640-supplement-5.pdf [file NIHMS233640-supplement-5.pdf]
